# Supplementary material for: Yes-Associated Protein (Yap) Is Required for Early Embryonic Development in Zebrafish (Danio Rerio)
Source: PubMed Central journal article supplement — Int J Biol Sci. 2013 Mar 6;9(3):267–78. doi: 10.7150/ijbs.4887 (PMC3596712; doi:10.7150/ijbs.4887), 2013-03-06
Supplement: ijbsv09p0267s1.pdf [file ijbsv09p0267s1.pdf]

## Supplementary data

614 AGAAGTTGGAAGAAGAGAAAAAAGTTAGTTAGGTTAGTGAGAGGGCTGTGATTTTCAA  
TGGCAGTACAGTCACTACCAATGCCTGCGTTAGAAGAGCCGTAACACTCTGGAAAAGCA  
ACACAGACAACGATTTTAGAAAAGTTTAGACACCTTAGAAAAAGTTTAGAGATACAGTTT  
TGTAGATATGCGCGTTTTCCACATTATTGGGTGTTTTGGCAAGCAGCAAAACACAACG  
TTGCCAATTTTTCTTCGCAAGGCTTGGATAATTGATAAAGCGGCCGGACACAGAACA  
TCTTTTGGGTGTTTTGGATTAAAATTTTCGCCATTTGTATGGTTGCAGCCGACTTTCC  
TTGAAAACGGTTTCAGTTGGATAGAAAAGAGTTTTACTTTTATCTGGAGTCATGGATC  
CGAACCAGCACAAACCCTCCAGCCGGCCACCAGATCGTCCATGTTTCGGGGAGACTCCGAGA  
CCGATCTGGAGGCTCTTTTAAACGCTGTGATGAACCCGAAAAACACCATCGTCCCCCTT  
CCGTGCCGATGAGGTTGAGAAAGCTGCCAGTCTCATTCTTACGCCGCCAGAGCCAAAGT  
CCCCTCCAGACAA

236 GCCAGTACAGATGCAGGTACTGCTGGTACCGTCACGCCCATCACGTCCGGGCACACTCC  
TCACCTGCCTCCTGACGCTGGGCGCAGTTTCTCCTGGTGCCTGACCAGCATGGGTCCA  
GCAAAACGCCCCACCTCAGCACCTCCGCCAGTCTCTTACGAGATACCTGATGACATGCCG  
CTGCCCCAGGCTGGGAGATGGCCAAGACCCCTTCGGGACAGAGATACTTCTTAAA

intron2 gtgagttgtaatgttcttgataaacgctactacagcatcatgggttaggggtgattaattgtttg

119 CCATAATGACCAGACGACCACCTGGCAGGACCCACGTAAAGCTCTCCTTCAGATGAACCA  
GGCCGCCCCAGCCAGCCAGTGCCTGTGACGCAACAGAACATCATGAACCCAGCCTCAG

114 GTCCTCTTCTGACGGGTGGGAACAAGCTATTACCTCAGAAGGAGAAATCTACTACATCA  
ATCACAAAGAACAAAACCCTCTTGGCTGGACCCACGACTTGACCCGCGTTTCG

173 CAATGAACCAGCAGCGAATTTCCAGAGTGCCCCAGTAAAGCAAGGTTCCAGTTGCCCT  
CCAGCCACAGAGTGGAGTGATGAGTGGAAACAACCCCATCCGACTGCAGCAGATCCACA  
TAGAGAAGGAGAGACTGAGGATCAAAACAAGAGCTCCTTCGCCAGAGACCTCAG

**Figure S1. Nucleotides sequences of RT-PCR after yap-MO(S) injection and difference between two transcript variants.** yap-MO(S) targeted site is underlined by a red line. Primers used in RT-PCR are underline by two green arrows. After yap-MO(S) injection, the large fragment contains parts of intron 2 which is wrote in blue and the small fragment omits exon 2. The YAP transcript variant YAP2 loses the forth exon which is underlined by a black line.

A

|             |                                                     |
|-------------|-----------------------------------------------------|
| chicken     | MDPGQPQPQ-QFPQAAQ-PPAPQQAAPQPPGAGSGAPGGAAQPPGAGH    |
| mouse-1     | MEPAQQPPPPQAPQGPA-PPS-----VSPAGTAAAPPA              |
| mouse-2     | MEPAQQPPPPQAPQGPA-PPS-----VSPAGTAAAPPA              |
| human-1     | MDPGQPPPPQAPQGGG-PPS-QPPQGGPPSSGGPQAPAPAAATQAAPQA   |
| human-2     | MDPGQPPPPQAPQGGG-PPS-QPPQGGPPSSGGPQAPAPAAATQAAPQA   |
| zebrafish-1 | MDPNQHN-----                                        |
| zebrafish-2 | MDPNQHN-----                                        |
| -----       |                                                     |
| chicken     | PPAGHQIVHVRGDSETDLEALFNAVHNPFGANVPHITLPMRLRKLDPDSF  |
| mouse-1     | PPAGHQVVHVRGDSETDLEALFNAVHNPKTANVPTVPMRLRKLDPDSF    |
| mouse-2     | PPAGHQVVHVRGDSETDLEALFNAVHNPKTANVPTVPMRLRKLDPDSF    |
| human-1     | PPAGHQIVHVRGDSETDLEALFNAVHNPKTANVPTVPMRLRKLDPDSF    |
| human-2     | PPAGHQIVHVRGDSETDLEALFNAVHNPKTANVPTVPMRLRKLDPDSF    |
| zebrafish-1 | PPAGHQIVHVRGDSETDLEALFNAVHNPKNITVPPSVPMRLRKLDPDSF   |
| zebrafish-2 | PPAGHQIVHVRGDSETDLEALFNAVHNPKNITVPPSVPMRLRKLDPDSF   |
| -----       |                                                     |
| chicken     | PKPPEPKSHSRQASTDAGTAGALTPQHVRHSSPASLQLGAVSPGTLT     |
| mouse-1     | PKPPEPKSHSRQASTDAGTAGALTPQHVRHSSPASLQLGAVSPGTLT     |
| mouse-2     | PKPPEPKSHSRQASTDAGTAGALTPQHVRHSSPASLQLGAVSPGTLT     |
| human-1     | PKPPEPKSHSRQASTDAGTAGALTPQHVRHSSPASLQLGAVSPGTLT     |
| human-2     | PKPPEPKSHSRQASTDAGTAGALTPQHVRHSSPASLQLGAVSPGTLT     |
| zebrafish-1 | PTPPEPKSHSRQASTDAGTAGTIVTPIHVRAHSSPASLQLGAVSPGALT   |
| zebrafish-2 | PTPPEPKSHSRQASTDAGTAGTIVTPIHVRAHSSPASLQLGAVSPGALT   |
| -----       |                                                     |
| chicken     | PSGVVTPGGA-PSQHILRQSSFEIPDDVPLPAGWEMAKTTPSGQRYFLN   |
| mouse-1     | ASGVVSGPAAAPAAQHILRQSSFEIPDDVPLPAGWEMAKTSSGQRYFLN   |
| mouse-2     | ASGVVSGPAAAPAAQHILRQSSFEIPDDVPLPAGWEMAKTSSGQRYFLN   |
| human-1     | PTGVVSGPAAATPQAQHILRQSSFEIPDDVPLPAGWEMAKTSSGQRYFLN  |
| human-2     | PTGVVSGPAAATPQAQHILRQSSFEIPDDVPLPAGWEMAKTSSGQRYFLN  |
| zebrafish-1 | SM-----GPNAP-PQHILRQSSYEIPDDMPLPAGWEMAKTTPSGQRYFLN  |
| zebrafish-2 | SM-----GPNAP-PQHILRQSSYEIPDDMPLPAGWEMAKTTPSGQRYFLN  |
| -----       |                                                     |
| chicken     | HIDQTTWQDPRKAMLSQINVTAPTSF-PV-QQNNHNSAS-----        |
| mouse-1     | HNDQTTWQDPRKAMLSQINVPAPASF-AV-PQTIHNSASGPIPDGRWE    |
| mouse-2     | HNDQTTWQDPRKAMLSQINVPAPASF-AV-PQTIHNSASGPIPDGRWE    |
| human-1     | HIDQTTWQDPRKAMLSQINVTAPTSF-PV-QQNNHNSAS-----        |
| human-2     | HIDQTTWQDPRKAMLSQINVTAPTSF-PV-QQNNHNSASGPIPDGRWE    |
| zebrafish-1 | HNDQTTWQDPRKALL-QMNGAAPASFPVPLQQNIDNHPASGPIPDGRWE   |
| zebrafish-2 | HNDQTTWQDPRKALL-QMNGAAPASFPVPLQQNIDNHPAS-----       |
| -----       |                                                     |
| chicken     | QAMTQDGEVYIYNHBNKTTSWLDPRLLDPRFAMN-ORIISQAPVKOPPE   |
| mouse-1     | QAMTQDGEVYIYNHBNKTTSWLDPRLLDPRFAMN-ORIISQAPVKOPPE   |
| mouse-2     | QAMTQDGEVYIYNHBNKTTSWLDPRLLDPRFAMN-ORIISQAPVKOPPE   |
| human-1     | QAMTQDGEIYIYNHBNKTTSWLDPRLLDPRFAMN-ORIISQAPVKOPPE   |
| human-2     | QAMTQDGEIYIYNHBNKTTSWLDPRLLDPRFAMN-ORIISQAPVKOPPE   |
| zebrafish-1 | QAITSEGIYIYNHBNKTTSWLDPRLLDPRFAMN-ORIISQAPVKQSSQ    |
| zebrafish-2 | QAITSEGIYIYNHBNKTTSWLDPRLLDPRFAMN-ORIISQAPVKQSSQ    |
| -----       |                                                     |
| chicken     | LAPQSPQGGVVGSSSNQQQQMRLLQQLQMEKERLRRLKQOELLRN       |
| mouse-1     | LAPQSPQGGVVGSSSNQQQQIQLQQLQMEKERLRRLKQOELLFR        |
| mouse-2     | LAPQSPQGGVVGSSSNQQQQIQLQQLQMEKERLRRLKQOELLFRQATFRN  |
| human-1     | LAPQSPQGGVVGSSSNQQQQMRLLQQLQMEKERLRRLKQOELLRQV      |
| human-2     | LAPQSPQGGVVGSSSNQQQQMRLLQQLQMEKERLRRLKQOELLRQAMBN   |
| zebrafish-1 | L-PSSPQSGVMSGNN-----PILRQQIHIKERLRRLRQ-ELLRC        |
| zebrafish-2 | L-PSSPQSGVMSGNN-----PILRQQIHIKERLRRLRQ-ELLRC        |
| -----       |                                                     |
| chicken     | -----QELALRSQLPT-LEQDGGTQNPVSSPGMSQELRTMTT          |
| mouse-1     | -----QELALRSQLPT-LEQDGGTQNPVSSPGMSQELRTMTT          |
| mouse-2     | LNPSSTANAPKQELALRSQLPT-LEQDGGTQNPVSSPGMSQELRTMTT    |
| human-1     | -----RQELALRSQLPT-LEQDGGTQNPVSSPGMSQELRTMTT         |
| human-2     | LNPSSTANSKQELALRSQLPT-LEQDGGTQNPVSSPGMSQELRTMTT     |
| zebrafish-1 | -----RQELALRNQLPTSMEDGGTQNPVSSPGMGQDARNMTT          |
| zebrafish-2 | -----RQELALRNQLPTSMEDGGTQNPVSSPGMGQDARNMTT          |
| -----       |                                                     |
| chicken     | NSSDPFLNSGTYHSRDESDTSGLSMSSYSVPRTPDDFLNSVDEMGTGD    |
| mouse-1     | NSSDPFLNSGTYHSRDESDTSGLSMSSYSI PRTPDDFLNSVDEMGTGD   |
| mouse-2     | NSSDPFLNSGTYHSRDESDTSGLSMSSYSI PRTPDDFLNSVDEMGTGD   |
| human-1     | NSSDPFLNSGTYHSRDESDTSGLSMSSYSVPRTPDDFLNSVDEMGTGD    |
| human-2     | NSSDPFLNSGTYHSRDESDTSGLSMSSYSVPRTPDDFLNSVDEMGTGD    |
| zebrafish-1 | NSSDPFLNSGTYHSRDESDTSGLSMSSYSVPRTPDDFLNSVDEMGTGD    |
| zebrafish-2 | NSSDPFLNSGTYHSRDESDTSGLSMSSYSVPRTPDDFLNSVDEMGTGD    |
| -----       |                                                     |
| chicken     | SIISQSNIPSHQNRFPDYLEAIPGTNVDLGTLEGGDMNIEGEEELMPSLQ  |
| mouse-1     | TIISQSTLPSQQSRFPDYLEAIPGTNVDLGTLEGGDAMNIEGEEELMPSLQ |
| mouse-2     | TIISQSTLPSQQSRFPDYLEAIPGTNVDLGTLEGGDAMNIEGEEELMPSLQ |
| human-1     | TINQSTLPSQQNRFPDYLEAIPGTNVDLGTLEGGDMNIEGEEELMPSLQ   |
| human-2     | TINQSTLPSQQNRFPDYLEAIPGTNVDLGTLEGGDMNIEGEEELMPSLQ   |
| zebrafish-1 | TLGPGSMATQPSRFPDYLDALPGTDVVDLGTLEGGSMAVEEGEELMPSLQ  |
| zebrafish-2 | TLGPGSMATQPSRFPDYLDALPGTDVVDLGTLEGGSMAVEEGEELMPSLQ  |
| -----       |                                                     |
| chicken     | EALSSDI LNDMESVLAATKLDKESFLTWI                      |
| mouse-1     | EALSSDI LNDMESVLAATKLDKESFLTWI                      |
| mouse-2     | EALSSDI LNDMESVLAATKLDKESFLTWI                      |
| human-1     | EALSSDI LNDMESVLAATKLDKESFLTWI                      |
| human-2     | EALSSDI LNDMESVLAATKLDKESFLTWI                      |
| zebrafish-1 | EALSSDI LNDMESVLAATKLDKENFLTWI                      |
| zebrafish-2 | EALSSDI LNDMESVLAATKLDKENFLTWI                      |

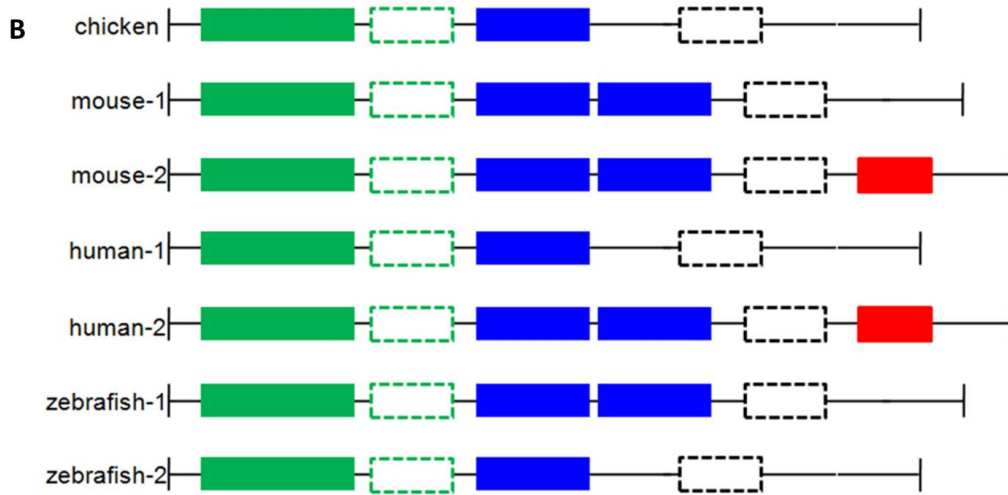

**Figure S2. BLAST result and schematic diagrams of YAP amino Acids sequences from different organisms** A) Protein sequence comparison among chicken YAP (NCBI Reference Sequence NP\_990574), two mouse transcriptional variants (NCBI Reference Sequence: NP\_001164618 and NP\_033560), two human transcriptional variants (NCBI Reference Sequence: NP\_001123617 and NP\_006097), zebrafish YAP with only one WW domain and zebrafish YAP with two WW domains (NCBI Reference Sequence: NP\_001132952). These amino acid sequences were analyzed using T-coffee (<http://tcoffee.vital-it.ch/cgi-bin/Tcoffee/tcoffee.cgi/index.cgi>). In the alignment, spaces are introduced arbitrarily and are indicated with dots. WW domain is underlined (blue), each with two featured tryptophan (W) residues denoted by blue dots. TEA/TEAD-binding domain is underlined (green). The 14-3-3 binding site is indicated by a green dashed line. HXRXXS motifs are underlined (black). proline-rich regions are indicated by a black dashed line. B) A schematic diagram shows the structures of these different YAPs. Green rectangles represent the TEA/TEAD-binding domain. Green rectangular dashed lines represent the 14-3-3 binding site. WW domains are indicated by blue blocks. Black rectangular dashed lines represent the proline-rich regions. The red blocks represent the sequence of *AXRNINPSTANXP*. For the purpose of clarity, some of the proteins and domains were not drawn to scale.
